# Supplementary material
Source: PubMed Central journal article supplement (PMC7477926)
Supplement: NIHMS1623028-supplement-Supplemental_Data.pdf [file NIHMS1623028-supplement-Supplemental_Data.pdf]

## SUPPLEMENTAL DATA

Supplement Table 1: Results of sleep scoring by full in-laboratory polysomnography with Fz moved to the forehead (PSG) vs scoring from a limited montage consisting of forehead EEG and chin EMG only (two independent scorers LM1 and LM2). Lines 1-3 in the table show the agreement between Full PSG and limited montage sleep scoring. While standard sleep scoring requires only the EEG, HSAT studies are usually scored with all channels visible. Because of this we also investigated the impact of visualizing flow and oximetry while scoring sleep on the HSAT. These results are shown in lines 4-6. The data show that there was little influence of visualizing airflow and oximetry on the agreement with PSG.

| <b>AGREEMENT<br/>Mean (min-max)</b> | <b>All Epochs<br/>(W, N1,N2,N3,R)</b> | <b>Wake vs Sleep<br/>(N1,N2,N3,R combined)</b> | <b>Wake/REM/NREM<br/>(N1,N2,N3 combined)</b> |
|-------------------------------------|---------------------------------------|------------------------------------------------|----------------------------------------------|
| <b>LM1 vs PSG</b>                   | 78% (59% - 88%)                       | 92% (70% -97%)                                 | 89% (68% - 96%)                              |
| <b>LM2 vs PSG</b>                   | 80% (66% - 92%)                       | 95% (81% - 100%)                               | 91% (80% - 97%)                              |
| <b>LM1 vs LM2</b>                   | 78% (63% - 88%)                       | 91% (76% - 97%)                                | 88% (76% - 96%)                              |
| <b>LM1 + flow vs PSG</b>            | 80% (68% - 89%)                       | 94% (81%- 99%)                                 | 91% (80% - 96%)                              |
| <b>LM2 + flow vs PSG</b>            | 81% (67% - 94%)                       | 95% (87% - 100%)                               | 92% (84% - 99%)                              |
| <b>LM1 + flow vs LM2 + flow</b>     | 79% (61% - 88%)                       | 93% (77% - 99%)                                | 90% (76% -97%)                               |

(Fz) scoring by scorer 1

LM2: Limited montage (Fz) scoring by scorer 2

PSG: Scoring from Full PSG

Supplement Table 2: Cross-tabulations of sleep scoring showing a) limited montage inter-scorer agreement, b) limited montage (scorer 1) vs PSG and c) limited montage (scorer 2) vs PSG.

a)

|     |      | LM2  |      |     |      |      |      |      |      |      |      |
|-----|------|------|------|-----|------|------|------|------|------|------|------|
|     |      | Wake | %row | N1  | %row | N2   | %row | N3   | %row | REM  | %row |
| LM1 | Wake | 4238 | 91%  | 293 | 6%   | 117  | 3%   | 6    | 0%   | 19   | 0%   |
|     | N1   | 605  | 32%  | 734 | 39%  | 497  | 26%  | 2    | 0%   | 68   | 4%   |
|     | N2   | 313  | 5%   | 436 | 6%   | 5383 | 78%  | 451  | 25%  | 296  | 4%   |
|     | N3   | 9    | 0%   | 13  | 1%   | 352  | 16%  | 1850 | 97%  | 18   | 1%   |
|     | REM  | 90   | 4%   | 119 | 6%   | 198  | 10%  | 17   | 0%   | 1631 | 79%  |

Kappa = 0.70

b)

|     |      | LM1  |      |      |      |      |      |      |      |      |      |
|-----|------|------|------|------|------|------|------|------|------|------|------|
|     |      | Wake | %row | N1   | %row | N2   | %row | N3   | %row | REM  | %row |
| PSG | Wake | 3967 | 93%  | 168  | 4%   | 87   | 2%   | 5    | 0%   | 17   | 0%   |
|     | N1   | 769  | 28%  | 1024 | 37%  | 873  | 31%  | 16   | 1%   | 94   | 3%   |
|     | N2   | 219  | 3%   | 309  | 5%   | 5188 | 82%  | 526  | 45%  | 60   | 1%   |
|     | N3   | 10   | 0%   | 11   | 1%   | 187  | 9%   | 1919 | 97%  | 17   | 1%   |
|     | REM  | 134  | 6%   | 111  | 5%   | 203  | 9%   | 17   | 0%   | 1845 | 80%  |

Kappa = 0.72

c)

|     |      | LM2  |      |      |      |      |      |      |      |      |      |
|-----|------|------|------|------|------|------|------|------|------|------|------|
|     |      | Wake | %row | N1   | %row | N2   | %row | N3   | %row | REM  | %row |
| PSG | Wake | 3905 | 90%  | 305  | 7%   | 56   | 1%   | 0    | 0%   | 49   | 1%   |
|     | N1   | 393  | 16%  | 1179 | 49%  | 677  | 28%  | 4    | 0%   | 134  | 6%   |
|     | N2   | 83   | 1%   | 593  | 9%   | 5324 | 81%  | 356  | 24%  | 226  | 3%   |
|     | N3   | 5    | 0%   | 11   | 0%   | 415  | 18%  | 1872 | 99%  | 0    | 0%   |
|     | REM  | 17   | 1%   | 111  | 5%   | 189  | 9%   | 17   | 0%   | 1860 | 85%  |

Kappa = 0.73

Supplement Table 3: Summary of events, sleep times, and respiratory event indices with and without EEG available to the scorer for a) subjects with complaints of difficulty falling or staying asleep and ESS < 7, and b) subjects with TST ≤ 70% of VST (low sleep efficiency). Delta = HSAT<sub>EEG</sub> – HSAT<sub>Polygraphy</sub>.

| Table 3a: Subjects with Complaints of Poor Sleep and Low Epworth Score (n=69) |                       |                               |                                  |
|-------------------------------------------------------------------------------|-----------------------|-------------------------------|----------------------------------|
| Results of Scoring HSAT with EEG vs without EEG (Polygraphy)                  |                       |                               |                                  |
| AHI4                                                                          | # Events<br>Mean ± SD | Sleep Time (min)<br>Mean ± SD | AHI4 (events/hr)<br>Median (IQR) |
| HSAT-EEG                                                                      | 61 ± 78               | 349 ± 69                      | 5.7 (1.0-14.9)                   |
| HSAT-Polygraphy                                                               | 69 ± 90               | 447 ± 62                      | 5.0 (0.7-12.8)                   |
| Delta                                                                         | -8.0 ± 2.7            | -97 ± 8                       | 0.7                              |
| Delta (%)                                                                     | -12%                  | -22%                          | 14%                              |
| RDI                                                                           | # Events<br>Mean ± SD | Sleep Time (min)<br>Mean ± SD | RDI (events/hr)<br>Median (IQR)  |
| HSAT-EEG                                                                      | 143 ± 94              | 349 ± 69                      | 22.4 (13.4-29.7)                 |
| HSAT-Polygraphy                                                               | 172 ± 116             | 447 ± 62                      | 20.3 (11.6-29.8)                 |
| Delta                                                                         | -29.3 ± 3.8           | -97 ± 8                       | 2.1                              |
| Delta (%)                                                                     | -17%                  | -22%                          | 10%                              |

| Table 3b: Subjects with Low Sleep Efficiency on HSAT with EEG (n=38) |                       |                               |                                  |
|----------------------------------------------------------------------|-----------------------|-------------------------------|----------------------------------|
| Results of Scoring HSAT with EEG vs without EEG (Polygraphy)         |                       |                               |                                  |
| AHI4                                                                 | # Events<br>Mean ± SD | Sleep Time (min)<br>Mean ± SD | AHI4 (events/hr)<br>Median (IQR) |
| HSAT-EEG                                                             | 72 ± 87               | 266 ± 74                      | 6.8 (2.6-24.9)                   |
| HSAT-Polygraphy                                                      | 83 ± 102              | 456 ± 95                      | 4.9 (1.8-16.4)                   |
| Delta                                                                | -11.2 ± 3.1           | -190 ± 10                     | 1.9                              |
| Delta (%)                                                            | -13%                  | -42%                          | 39%                              |
| RDI                                                                  | # Events<br>Mean ± SD | Sleep Time (min)<br>Mean ± SD | RDI (events/hr)<br>Median (IQR)  |
| HSAT-EEG                                                             | 139 ± 99              | 266 ± 74                      | 24.2 (16.5-48.2)                 |
| HSAT-Polygraphy                                                      | 173 ± 119             | 456 ± 95                      | 19.5 (10.9-32.3)                 |
| Delta                                                                | -34.3 ± 4.5           | -190 ± 10                     | 4.7                              |
| Delta (%)                                                            | -20%                  | -42%                          | 24%                              |

Supplement Table 4: Cross-tabulations of OSA severity defined by AHI4 scoring with and without EEG for a) subjects with complaints of Poor Sleep and low Epworth Score, and b) subjects with low sleep efficiency.

| a) Complaint of Poor Sleep and Low Epworth |          |          | OSA Severity AHI4 Polygraphy |       |          |        |
|--------------------------------------------|----------|----------|------------------------------|-------|----------|--------|
|                                            |          |          | No OSA                       | Mild  | Moderate | Severe |
| OSA Severity<br>AHI4 EEG                   | No OSA   | Count    | 31                           | 0     | 0        | 0      |
|                                            |          | % of Row | 100.0%                       | 0.0%  | 0.0%     | 0.0%   |
|                                            | Mild     | Count    | 3                            | 17    | 1        | 0      |
|                                            |          | % of Row | 14.3%                        | 81.0% | 4.8%     | 0.0%   |
|                                            | Moderate | Count    | 0                            | 2     | 7        | 0      |
|                                            |          | % of Row | 0.0%                         | 22.2% | 77.8%    | 0.0%   |
|                                            | Severe   | Count    | 0                            | 0     | 3        | 5      |
|                                            |          | % of Row | 0.0%                         | 0.0%  | 37.5%    | 62.5%  |

| b) Low Sleep Efficiency  |          |          | OSA Severity AHI4 Polygraphy |       |          |        |
|--------------------------|----------|----------|------------------------------|-------|----------|--------|
|                          |          |          | No OSA                       | Mild  | Moderate | Severe |
| OSA Severity<br>AHI4 EEG | No OSA   | Count    | 14                           | 0     | 0        | 0      |
|                          |          | % of Row | 100.0%                       | 0.0%  | 0.0%     | 0.0%   |
|                          | Mild     | Count    | 5                            | 7     | 0        | 0      |
|                          |          | % of Row | 41.7%                        | 58.3% | 0.0%     | 0.0%   |
|                          | Moderate | Count    | 0                            | 2     | 1        | 0      |
|                          |          | % of Row | 0.0%                         | 66.7% | 33.3%    | 0.0%   |
|                          | Severe   | Count    | 0                            | 0     | 4        | 5      |
|                          |          | % of Row | 0.0%                         | 0.0%  | 44.4%    | 55.6%  |
